# Supplementary material for: The Ser82 RAGE Variant Affects Lung Function and Serum RAGE in Smokers and sRAGE Production In Vitro
Source: PubMed Central journal article supplement (PMC5068780; doi:10.1371/journal.pone.0164041), 2016-10-18
Supplement: pone.0164041.s001.pdf [file pone.0164041.s001.pdf]

**Title: Characterisation of *AGER* in the airways and periphery**

**Supplementary File**

**S1 Table. Linear Regression analysis of lung function measures and rs2070600 genotyping.** rs2070600T was associated with increased FEV1 and FEV1/FVC ratio. Minor allele frequency of tested population = 10%. Coded allele = T.

1a: FEV1

| FEV <sub>1</sub> β | FEV <sub>1</sub> SE | FEV <sub>1</sub> P value |
|--------------------|---------------------|--------------------------|
| 0.145              | 0.067               | 0.031                    |

1b: FVC

| FVC β | FVC SE | FVC P value |
|-------|--------|-------------|
| 0.086 | 0.072  | 0.23        |

1c: FEV<sub>1</sub>/FVC

| FEV <sub>1</sub> /FVC β | FEV <sub>1</sub> /FVC SE | FEV <sub>1</sub> /FVC P value |
|-------------------------|--------------------------|-------------------------------|
| 0.033                   | 0.015                    | 0.028                         |
