# Supplementary material for: The Ser82 RAGE Variant Affects Lung Function and Serum RAGE in Smokers and sRAGE Production In Vitro
Source: PubMed Central journal article supplement (PMC5068780; doi:10.1371/journal.pone.0164041), 2016-10-18
Supplement: pone.0164041.s002.pdf [file pone.0164041.s002.pdf]

**Title: Characterisation of *AGER* in the airways and periphery**

**Supplementary File**

**S2 Table. Serum soluble RAGE levels in 102 individual stratified by rs2070600 genotype.**

Serum sRAGE levels were lower in individuals with a C:T genotype for rs2070600.

| rs2070600 genotype | sRAGE (pg/ml) | Mean | Median | Samples |
|--------------------|---------------|------|--------|---------|
| C:C                | 319 - 4197    | 993  | 801    | 51      |
| C:T                | 183 - 1811    | 633  | 597    | 51      |
