# Supplementary material for: The Ser82 RAGE Variant Affects Lung Function and Serum RAGE in Smokers and sRAGE Production In Vitro
Source: PubMed Central journal article supplement (PMC5068780; doi:10.1371/journal.pone.0164041), 2016-10-18
Supplement: pone.0164041.s003.pdf [file pone.0164041.s003.pdf]

**Title: Characterisation of *AGER* in the airways and periphery**

**Supplementary File**

**S3 Table. Linear regression analysis of serum sRAGE level and lung function measures FEV<sub>1</sub>, FVC and FEV<sub>1</sub>/FVC.** Serum sRAGE levels was not associated with FEV<sub>1</sub>, FVC or FEV<sub>1</sub>/FVC when subjects were stratified by genotype. F = statistical significance of the regression equation as a whole.

| Samples       | Lung function measure | F     | P value |
|---------------|-----------------------|-------|---------|
| All (n = 102) | FEV <sub>1</sub>      | 0.869 | 0.354   |
|               | FVC                   | 0.379 | 0.504   |
|               | FEV <sub>1</sub> /FVC | 0.515 | 0.475   |
| C:C genotype  | FEV <sub>1</sub>      | 0.493 | 0.486   |
|               | FVC                   | 1.195 | 0.280   |
|               | FEV <sub>1</sub> /FVC | 0.385 | 0.535   |
| C:T genotype  | FEV <sub>1</sub>      | 0.063 | 0.804   |
|               | FVC                   | 0.001 | 0.982   |
|               | FEV <sub>1</sub> /FVC | 0.002 | 0.968   |
